# Supplementary material for: Identification of histone acetyltransferase genes responsible for cannabinoid synthesis in hemp
Source: Chin Med. 2023 Feb 13;18:16. doi: 10.1186/s13020-023-00720-0 (PMC9926835; doi:10.1186/s13020-023-00720-0)
Supplement: Supplementary file 1 — Additional file 1: Table S1. Genes and their primer sequesnces for qRT-PCR. [file 13020_2023_720_MOESM1_ESM.xlsx]

## Sheet: Sheet1
Table S1 Genes and their primer sequesnces for qRT-PCR
Name	Primer sequences (5′−3′)	Tm(℃)	Product size (bp)
EF1α	F-TGTTTTGCACGGATCAGTTTG	58–60	100
	R-AATGCCGACCGCTACAGTTC
CsHATs-1	F-GCCAGCTTACGTGAACATGA	59-60	167
	R-TTGCGCTTCATGAAATTGAG
CsHATs-2	F-GCCAGCAGATTACCGTGATT	59-60	164
	R-GGTGAGGTCCAAGGCAATAA
CsHATs-7	F-ATTGCGGATGTGAAGAGGATG	59-60	122
	R-TGGAGACCTGATTGAACTTTGC
CsHATs-8	F-GCCATTCAAAGAGCCAGTC	55-58	135
	R-TTGGCTGTGTGGCTCCTTT
CsHATs-9	F-CCATTCAAAGAGCCAGTC	50-52	92
	R-AGGACACAACGCAAACTG
CsHATs-11	F-TTCGGTGGAGAGTGATTATGAT	59-60	186
	R-ATGACCATTCGGACAACCTC
GPP2	F-GAACTCGTAGGCGGAAAAGA	57-58	147
	R-GAAGACTTTGTGGTTTGTGGG
AAE18	F-TATCAAAAAAAGGTTCCAAGCC	58-59	142
	R-CCCGTTGATAGTAGTTGCTCGT
PT7	F-TCTCCTATCCTATGTGGCTGC	57-58	167
	R-CGTAAAATCTTCTGCCTGCTT
CBDAS4	F-AAACAATAACAATGGCACTACA	52-54	95
	R-TCTTTACACGAAGCAACCTAT
CBDAS6	F-TAGGTGGGTGGAGAAGGGGA	60-61	185
	R-AAACGCTTGCTTGTTCGTAGGTA
