# Supplementary material for: Identification of histone acetyltransferase genes responsible for cannabinoid synthesis in hemp
Source: Chin Med. 2023 Feb 13;18:16. doi: 10.1186/s13020-023-00720-0 (PMC9926835; doi:10.1186/s13020-023-00720-0)
Supplement: Supplementary file 2 — Additional file 2: Table S2. The acquisition parameters of each compound. [file 13020_2023_720_MOESM2_ESM.xlsx]

## Sheet: Sheet1
Table S2 The acquisition parameters of each compound
Compound	Retention time	Parent ion	Daughter ion	Frag	CE
	(min)	（m/z）	（m/z）	（V）	（V）
CBG	8.787	317.2	193.3	120	10
		317.2	123	120	25
CBD	9.303	315.3	193.3	120	22
		315.3	259.3	120	20
